# Supplementary material for: The Impact of Red Yeast Rice Extract Use on the Occurrence of Muscle Symptoms and Liver Dysfunction: An Update from the Adverse Event Reporting Systems and Available Meta-Analyses
Source: MDPI journal article supplement (doi:10.3390/nu16030444), 2024-02-02
Supplement: s1 [file s1]

**Supplementary Table S1.** Number of adverse event cases in people taking red yeast rice from the FAERS database

|                                                      | Number of cases |
|------------------------------------------------------|-----------------|
| <b>Total cases</b>                                   | <b>28</b>       |
| Nervous system disorders                             | 14              |
| General disorders and administration site conditions | 13              |
| Musculoskeletal and connective tissue disorders      | 8               |
| Investigations                                       | 5               |
| Hepatobiliary disorders                              | 4               |
| Gastrointestinal disorders                           | 3               |
| Injury, poisoning and procedural complications       | 2               |
| Psychiatric disorders                                | 2               |
| Metabolism and nutrition disorders                   | 2               |
| Product issues                                       | 2               |
| Skin and subcutaneous tissue disorders               | 1               |
| Blood and lymphatic system disorders                 | 1               |
| Immune system disorders                              | 1               |

**Supplementary Table S2.** Number of muscular and hepatic adverse event cases in people taking red yeast rice from the FAERS database analysed by gender and age

|                                                        |                 | Reaction groups by sex |          |               | Reaction groups by age |             |           |               |
|--------------------------------------------------------|-----------------|------------------------|----------|---------------|------------------------|-------------|-----------|---------------|
|                                                        | Number of cases | female                 | male     | not specified | 18-64 years            | 65-85 years | >85 years | not specified |
| <b>Musculoskeletal and connective tissue disorders</b> | <b>8</b>        | <b>7</b>               | <b>1</b> |               | <b>3</b>               | <b>4</b>    |           | <b>1</b>      |
| Myopathy                                               | 5               | 4                      | 1        |               | 1                      | 4           |           |               |
| Rhabdomyolysis                                         | 4               | 4                      |          |               |                        | 4           |           |               |
| Pain in extremity                                      | 1               | 1                      |          |               |                        |             |           | 1             |
| Muscular weakness                                      | 1               | 1                      |          |               | 1                      |             |           |               |
| Myalgia                                                | 1               | 1                      |          |               | 1                      |             |           |               |
| Sacral pain                                            | 1               |                        | 1        |               | 1                      |             |           |               |
| <b>Hepatobiliary disorders</b>                         | <b>4</b>        |                        | <b>4</b> |               | <b>3</b>               | <b>1</b>    |           |               |
| Hepatic cytolysis                                      | 3               |                        | 3        |               | 3                      |             |           |               |
| Liver injury                                           | 1               |                        | 1        |               |                        | 1           |           |               |

**Supplementary Table S3.** Details of muscular adverse event reports in people taking red yeast rice (FAERS database)

| Suspect Product Active Ingredients                                                                                            | Concomitant product | Reactions                                                                                                                                        | Serious     | Outcomes                     | Sex    | Patient Age   | Reporter Type           | Country where event occurred |
|-------------------------------------------------------------------------------------------------------------------------------|---------------------|--------------------------------------------------------------------------------------------------------------------------------------------------|-------------|------------------------------|--------|---------------|-------------------------|------------------------------|
| <b>Red Yeast</b> ; Simvastatin; Atorvastatin; Rosuvastatin; Fenofibrate                                                       | no                  | <b>Rhabdomyolysis; Myopathy</b>                                                                                                                  | Serious     | Other Outcomes               | Female | 74 YR         | Healthcare Professional | US                           |
| Pregabalin; Prednisone; Ezetimibe; <b>Red Yeast</b>                                                                           | yes                 | Feeling abnormal; inflammation; somnolence; bradyphrenia; weight increased; blood test abnormal; <b>pain in extremity</b> ; gait inability       | Non-Serious | Non-Serious                  | Female | Not Specified | Consumer                | US                           |
| <b>Red Yeast</b> ; Aspirin; Atorvastatin; Rosuvastatin; Lovastatin; Pravastatin Sodium; Simvastatin; Colestipol; Dipyridamole | no                  | <b>Rhabdomyolysis; myopathy</b>                                                                                                                  | Serious     | Other Outcomes               | Female | 77 YR         | Healthcare Professional | US                           |
| <b>Red Yeast</b> ; Lovastatin; Pravastatin; Rosuvastatin; Atorvastatin; Cholestyramine; Simvastatin                           | no                  | <b>Rhabdomyolysis; myopathy</b>                                                                                                                  | Serious     | Other Outcomes               | Female | 78 YR         | Healthcare Professional | IT                           |
| Sertraline Hydrochloride; Dietary Supplement; Rosuvastatin Calcium; <b>Red Yeast</b>                                          | no                  | Food interaction; <b>myopathy</b> ; <b>rhabdomyolysis</b> ; drug interaction                                                                     | Serious     | Other Outcomes               | Female | 70 YR         | Healthcare Professional | IT                           |
| Atorvastatin Calcium; <b>Red Yeast</b>                                                                                        | yes                 | Blood <b>creatine phosphokinase increased</b> ; blood creatine phosphokinase Mb increased; <b>myalgia</b> ; chest discomfort; fatigue; dizziness | Serious     | Other Outcomes; Hospitalized | Female | 56 YR         | Healthcare Professional | CN                           |
| Atorvastatin; Fluvastatin Sodium; Simvastatin; <b>Red Yeast</b> ; Lovastatin                                                  | no                  | <b>Myopathy; sacral pain</b>                                                                                                                     | Serious     | Other Outcomes               | Male   | 51 YR         | Healthcare Professional | DE                           |
| Atorvastatin Calcium; <b>Red Yeast</b>                                                                                        | yes                 | <b>Muscular weakness</b> ; nausea; balance disorder                                                                                              | Serious     | Hospitalized                 | Female | 60 YR         | Healthcare Professional | FR                           |

**Supplementary Table S4.** Details of hepatic adverse event reports in people taking red yeast rice (FAERS database)

| Suspect Product Active Ingredients                                        | Concomitant Product Names                 | Reactions                                  | Serious | Outcomes       | Sex  | Latest FDA Received Date | Patient Age | Reporter Type           | Country where event occurred |
|---------------------------------------------------------------------------|-------------------------------------------|--------------------------------------------|---------|----------------|------|--------------------------|-------------|-------------------------|------------------------------|
| <b>Red Yeast;</b> Herbals\Turmeric; Atorvastatin                          | Ramipril; Kardegic                        | Drug interaction; <b>hepatic cytolysis</b> | Serious | Other Outcomes | Male | 14-AUG-2019              | 56 YR       | Healthcare Professional | FR                           |
| <b>Red Yeast;</b> Atorvastatin Calcium; Curcuma Xanthorrhiza Root Extract | Kardegic; Ramipril                        | <b>Hepatic cytolysis;</b> drug interaction | Serious | Other Outcomes | Male | 26-MAR-2019              | 56 YR       | Healthcare Professional | FR                           |
| <b>Red Yeast;</b> Amiodarone Hydrochloride                                | Nifedipine; Warfarin; Bisoprolol Fumarate | Drug interaction; <b>liver injury</b>      | Serious | Other Outcomes | Male | 05-JAN-2015              | 68 YR       | Healthcare Professional | CN                           |
| <b>Red Yeast;</b> Tamsulosin Hydrochloride; Allopurinol                   | Rabeprazole Sodium                        | Urticaria; <b>hepatic cytolysis</b>        | Serious | Hospitalized   | Male | 29-MAY-2013              | 45 YR       | Healthcare Professional | FR                           |

**Supplementary Table S5.** Details of muscular adverse event reports in people taking red yeast rice (CAERS database)

| Date FDA first received report | Product type | PRODUCT                                | Patient Age | Sex    | Reactions                                                                                                                                                                                                                                                                                                           | CASE_OUTCOME                                                                                        |
|--------------------------------|--------------|----------------------------------------|-------------|--------|---------------------------------------------------------------------------------------------------------------------------------------------------------------------------------------------------------------------------------------------------------------------------------------------------------------------|-----------------------------------------------------------------------------------------------------|
| 7/6/2020                       | SUSPECT      | Red yeast rice plus COQ-10             | 71          | Female | Asthenia, diarrhoea, dizziness, hypotension, loss of consciousness, <u>muscle spasms</u> , nausea                                                                                                                                                                                                                   | Other Serious or Important Medical Event                                                            |
| 4/16/2019                      | SUSPECT      | Red yeast rice 600 mg                  | 73          | Female | <u>Muscle spasms, myalgia</u>                                                                                                                                                                                                                                                                                       | Hospitalization, Visited Emergency Room                                                             |
| 10/11/2018                     | SUSPECT      | Red yeast rice                         | 66          | Female | Abdominal discomfort, abdominal pain upper, alanine aminotransferase increased, aspartate aminotransferase increased, chest discomfort, chest pain, dyspepsia, epigastric discomfort, eructation, flatulence, gastrointestinal sounds abnormal, headache, malaise, <u>muscle spasms, myalgia, pain in extremity</u> | Other Serious or Important Medical Event                                                            |
| 5/24/2018                      | SUSPECT      | Red yeast rice                         | 61          | Male   | Amnesia, anaemia, blood potassium increased, bradykinesia, catatonia, claustrophobia, fall, heart rate increased, mydriasis, platelet count increased, <u>rhabdomyolysis</u> , weight increased, white blood cell count increased                                                                                   | Life Threatening, Hospitalization, Other Serious or Important Medical Event, Visited Emergency Room |
| 3/13/2018                      | SUSPECT      | Red yeast rice                         | 70          | Female | Burning sensation, cardiac disorder, dizziness, fall, gout, hypoaesthesia, <u>musculoskeletal pain</u> , neuropathy peripheral, pain, psychomotor hyperactivity, red blood cell count increased, somnolence                                                                                                         | Hospitalization, Other Serious or Important Medical Event                                           |
| 12/28/2016                     | SUSPECT      | Red yeast rice 600 mg                  | 61          | Male   | Blood pressure increased, cardiac disorder, chest discomfort, confusional state, <u>myalgia</u> , myocardial infarction, troponin increased                                                                                                                                                                         | Hospitalization, Other Serious or Important Medical Event, Visited Emergency Room                   |
| 5/4/2016                       | SUSPECT      | Red yeast rice                         | 63          | Female | Chest pain, chest X-ray abnormal, computerised tomogram abnormal, discomfort, dyspnoea, <u>muscle spasms</u> , pleural effusion, pneumonia                                                                                                                                                                          | Other Serious or Important Medical Event, Visited Emergency Room, Visited a Health Care Provider    |
| 3/4/2016                       | SUSPECT      | Red yeast rice                         | 46          | Male   | <u>Muscle disorders</u>                                                                                                                                                                                                                                                                                             | Other Outcome                                                                                       |
| 11/25/2015                     | SUSPECT      | Red yeast rice 600 mg with policosanol | 91          | Female | Cardiac arrest, cardiac failure, <u>muscle spasms</u> , death                                                                                                                                                                                                                                                       | Death, Visited a Health Care Provider                                                               |
| 6/30/2015                      | SUSPECT      | Red yeast rice 600 mg                  | 75          | Female | Abasia, asthenia, blood sodium decreased, fatigue, fluid overload, <u>muscle spasms, nausea, vomiting</u>                                                                                                                                                                                                           | Hospitalization                                                                                     |
| 6/9/2015                       | SUSPECT      | Red yeast rice 600 mg                  | 85          | Female | Abdominal pain upper, back pain, compression fracture, intervertebral disc calcification, <u>musculoskeletal chest pain</u> , pain                                                                                                                                                                                  | Other Serious or Important Medical Event, Visited Emergency Room, Visited a Health Care Provider    |
| 2/23/2015                      | SUSPECT      | Red yeast rice 600 mg                  | 78          | Male   | Abasia, arrhythmia, bradycardia, <u>rhabdomyolysis</u> , swelling                                                                                                                                                                                                                                                   | Hospitalization, Visited Emergency Room                                                             |
| 2/18/2015                      | SUSPECT      | Red yeast rice plus COQ-10             | 64          | Female | Arthralgia, asthenia, cataract, dysstasia, fatigue, gait disturbance, hepatic enzyme increased, <u>muscular weakness, myopathy</u> , pain                                                                                                                                                                           | Disability                                                                                          |
| 12/15/2014                     | SUSPECT      | Red yeast rice                         |             | Male   | <u>Myalgia</u>                                                                                                                                                                                                                                                                                                      | Other Serious or Important Medical Event, Visited a Health Care Provider                            |
| 7/3/2014                       | SUSPECT      | Red yeast rice                         | 58          |        | Arthralgia, asthenia, fatigue, <u>myalgia</u>                                                                                                                                                                                                                                                                       | Other Serious or Important Medical Event                                                            |
| 6/30/2014                      | SUSPECT      | Red yeast rice                         | 63          | Female | <u>Muscle spasms, myalgia</u>                                                                                                                                                                                                                                                                                       | Other Outcome                                                                                       |
| 9/5/2013                       | SUSPECT      | Red yeast rice 600 mg                  |             |        | Anaphylactic reaction, breast mass, <u>muscle spasms</u> , pain, pharyngitis                                                                                                                                                                                                                                        | Hospitalization, Visited a Health Care Provider                                                     |

|            |         |                                         |    |        |                                                                                                                                                                                                                                                                                                                                                                                                                                                                                                   |                                                                                                                         |
|------------|---------|-----------------------------------------|----|--------|---------------------------------------------------------------------------------------------------------------------------------------------------------------------------------------------------------------------------------------------------------------------------------------------------------------------------------------------------------------------------------------------------------------------------------------------------------------------------------------------------|-------------------------------------------------------------------------------------------------------------------------|
| 3/19/2013  | SUSPECT | Red yeast rice 600 mg                   | 64 | Female | Activities of daily living impaired, arthralgia, blood glucose increased, C-reactive protein increased, gait disturbance, glycosylated haemoglobin increased, incontinence, low density lipoprotein increased, <u>musculoskeletal stiffness</u> , pain, polyarthritis, red blood cell sedimentation rate increased                                                                                                                                                                                | Disability, Visited a Health Care Provider                                                                              |
| 2/27/2013  | SUSPECT | Red yeast rice 600 mg                   |    |        | Aortic stenosis, asthenia, atrioventricular block first degree, blood pressure increased, body temperature increased, cardiac murmur, chest pain, dyspnoea, erythema, incontinence, lung hyperinflation, malaise, mitral valve incompetence, <u>myalgia</u> , osteoarthritis, pain, palpitations, respiration rate increased, sensation of pressure, sinusitis, swelling, tenderness, tenosynovitis, tricuspid valve incompetence, ultrasound doppler abnormal, upper respiratory tract infection | Hospitalization, Required Intervention, Other Serious or Important Medical Event, Visited Emergency Room                |
| 3/5/2012   | SUSPECT | Red yeast rice                          | 79 | Male   | Asthenia, body temperature increased, carpal tunnel syndrome, malaise, <u>muscular weakness</u> , urinary tract infection                                                                                                                                                                                                                                                                                                                                                                         | Life Threatening, Hospitalization, Required Intervention, Disability, Other Serious or Important Medical Event          |
| 11/16/2011 | SUSPECT | Red yeast rice 600 mg                   | 70 | Female | Abdominal pain upper, asthenia, blood urine present, dysphagia, faeces discoloured, gastric haemorrhage, gastritis, <u>muscle disorder</u>                                                                                                                                                                                                                                                                                                                                                        | Other Serious or Important Medical Event                                                                                |
| 10/12/2011 | SUSPECT | Red yeast rice                          | 47 | Female | Fatigue, <u>myalgia</u> , swelling                                                                                                                                                                                                                                                                                                                                                                                                                                                                | Life Threatening                                                                                                        |
| 1/3/2011   | SUSPECT | Red yeast rice 600 mg                   | 44 | Male   | Asthenia, <u>myalgia</u> , tenderness                                                                                                                                                                                                                                                                                                                                                                                                                                                             | Visited a Health Care Provider                                                                                          |
| 12/6/2010  | SUSPECT | Red yeast rice plus COQ-10              | 64 | Male   | Anaemia, atrophy, back pain, blood creatinine increased, blood potassium increased, blood urea increased, fibrosis, glomerulosclerosis, haematocrit decreased, haemoglobin decreased, <u>hepatomegaly</u> , <u>muscle spasms</u> , nephritis interstitial, red blood cell count decreased, renal impairment, renal tubular atrophy, thrombotic microangiopathy                                                                                                                                    | Required Intervention, Visited a Health Care Provider                                                                   |
| 10/13/2010 | SUSPECT | Red yeast rice                          | 77 | Male   | Dyspepsia, <u>myalgia</u> , tenderness                                                                                                                                                                                                                                                                                                                                                                                                                                                            | Visited a Health Care Provider                                                                                          |
| 2/26/2009  | SUSPECT | Red yeast rice 600 mg                   | 56 | Female | <u>Muscle tightness</u> , <u>muscular weakness</u>                                                                                                                                                                                                                                                                                                                                                                                                                                                | Other Outcome                                                                                                           |
| 7/30/2008  | SUSPECT | Red yeast rice plus COQ-10              | 64 | Female | Cough, dysstasia, ear discomfort, inflammation, <u>muscular weakness</u> , rash, respiratory tract congestion, sinus disorder                                                                                                                                                                                                                                                                                                                                                                     | Other Serious or Important Medical Event, Other Serious Outcome                                                         |
| 7/30/2008  | SUSPECT | Red yeast rice                          | 70 | Female | Arteriosclerosis, carotid artery occlusion, carotid endarterectomy, drug ineffective, <u>muscle spasms</u> , <u>pain in extremity</u>                                                                                                                                                                                                                                                                                                                                                             | Required Intervention, Other Serious or Important Medical Event, Other Serious Outcome                                  |
| 7/17/2008  | SUSPECT | Red yeast rice plus COQ-10              | 69 | Male   | Abasia, abdominal distension, activities of daily living impaired, anal injury, anal sphincter atony, asthenia, diarrhoea, flatulence, gastrointestinal infection, headache, <u>muscle spasms</u> , <u>myalgia</u> , <u>myopathy</u> , nausea, oedema peripheral, pain swelling, tenderness, toothache                                                                                                                                                                                            | Other Serious or Important Medical Event, Visited Emergency Room, Visited a Health Care Provider, Other Serious Outcome |
| 8/13/2007  | SUSPECT | Red yeast rice 600 mg                   | 51 | Female | <u>Muscle fatigue</u>                                                                                                                                                                                                                                                                                                                                                                                                                                                                             | Other Serious or Important Medical Event, Visited a Health Care Provider                                                |
| 8/28/2006  | SUSPECT | Red yeast rice 600 mg plus COQ-10 30 mg | 55 | Female | Fatigue, headache, hypoaesthesia, <u>myalgia</u>                                                                                                                                                                                                                                                                                                                                                                                                                                                  | Required Intervention, Visited a Health Care Provider                                                                   |
| 12/9/2005  | SUSPECT | Red yeast rice                          |    | Female | Asthenia, fatigue, <u>myalgia</u>                                                                                                                                                                                                                                                                                                                                                                                                                                                                 | Visited a Health Care Provider                                                                                          |
| 10/6/2005  | SUSPECT | Red yeast rice                          | 76 | Female | Dyspepsia, fatigue, <u>muscular weakness</u> , pain                                                                                                                                                                                                                                                                                                                                                                                                                                               | Required Intervention                                                                                                   |
| 9/16/2005  | SUSPECT | Red yeast rice 600 mg                   |    | Female | Confusional state, dizziness, fatigue, influenza-like illness, <u>muscular weakness</u> , <u>rhabdomyolysis</u> , tremor                                                                                                                                                                                                                                                                                                                                                                          | Other Outcome                                                                                                           |

|            |             |                |    |        |                                                                                                                                                                                               |                                          |
|------------|-------------|----------------|----|--------|-----------------------------------------------------------------------------------------------------------------------------------------------------------------------------------------------|------------------------------------------|
| 11/24/2021 | CONCOMITANT | Red yeast rice | 58 | Female | Diarrhoea, faeces discoloured, <u>muscle spasms</u> , nausea                                                                                                                                  | Other Serious or Important Medical Event |
| 1/28/2020  | CONCOMITANT | Red yeast rice | 54 | Male   | <u>Musculoskeletal discomfort, musculoskeletal stiffness</u>                                                                                                                                  | Other Serious or Important Medical Event |
| 3/12/2013  | CONCOMITANT | Red yeast rice | 67 | Female | Blood cholesterol increased, fatigue, liver function test abnormal, malaise, <u>muscle spasms, myalgia</u> , thyroid function test abnormal                                                   | Visited a Health Care Provider           |
| 3/12/2013  | CONCOMITANT | Red yeast rice | 69 | Female | Blood cholesterol increased, fatigue, liver function test abnormal, malaise, <u>muscle spasms, myalgia</u> , thyroid function test abnormal                                                   | Visited a Health Care Provider           |
| 3/12/2013  | CONCOMITANT | Red yeast rice | 45 | Female | Blood cholesterol increased, fatigue, liver function test abnormal, malaise, <u>muscle spasms, myalgia</u> , thyroid function test abnormal                                                   | Visited a Health Care Provider           |
| 3/12/2013  | CONCOMITANT | Red yeast rice | 57 | Male   | Blood cholesterol increased, fatigue, liver function test abnormal, malaise, <u>muscle spasms, myalgia</u> , thyroid function test abnormal                                                   | Visited a Health Care Provider           |
| 3/12/2013  | CONCOMITANT | Red yeast rice | 62 | Female | Blood cholesterol increased, fatigue, liver function test abnormal, malaise, <u>muscle spasms, myalgia</u> , thyroid function test abnormal                                                   | Visited a Health Care Provider           |
| 3/12/2013  | CONCOMITANT | Red yeast rice | 77 | Female | Blood cholesterol increased, fatigue, liver function test abnormal, malaise, <u>muscle spasms, myalgia</u> , thyroid function test abnormal                                                   | Visited a Health Care Provider           |
| 3/12/2013  | CONCOMITANT | Red yeast rice | 52 | Female | Blood cholesterol increased, fatigue, liver function test abnormal, malaise, <u>muscle spasms, myalgia</u> , thyroid function test abnormal                                                   | Visited a Health Care Provider           |
| 3/12/2013  | CONCOMITANT | Red yeast rice |    |        | Blood cholesterol increased, fatigue, liver function test abnormal, malaise, <u>muscle spasms, myalgia</u> , thyroid function test abnormal                                                   | Visited a Health Care Provider           |
| 3/12/2013  | CONCOMITANT | Red yeast rice | 39 | Female | Blood cholesterol increased, fatigue, liver function test abnormal, malaise, <u>muscle spasms, myalgia</u> , thyroid function test abnormal                                                   | Visited a Health Care Provider           |
| 3/12/2013  | CONCOMITANT | Red yeast rice | 43 | Male   | Blood cholesterol increased, fatigue, liver function test abnormal, malaise, <u>muscle spasms, myalgia</u> , thyroid function test abnormal                                                   | Visited a Health Care Provider           |
| 3/12/2013  | CONCOMITANT | Red yeast rice | 46 | Male   | Blood cholesterol increased, fatigue, liver function test abnormal, malaise, <u>muscle spasms, myalgia</u> , thyroid function test abnormal                                                   | Visited a Health Care Provider           |
| 3/12/2013  | CONCOMITANT | Red yeast rice | 69 | Female | Blood cholesterol increased, fatigue, liver function test abnormal, malaise, <u>muscle spasms, myalgia</u> , thyroid function test abnormal                                                   | Visited a Health Care Provider           |
| 3/12/2013  | CONCOMITANT | Red yeast rice | 59 | Male   | Blood cholesterol increased, fatigue, liver function test abnormal, malaise, <u>muscle spasms, myalgia</u> , thyroid function test abnormal                                                   | Visited a Health Care Provider           |
| 3/12/2013  | CONCOMITANT | Red yeast rice | 58 | Male   | Blood cholesterol increased, fatigue, liver function test abnormal, malaise, <u>muscle spasms, myalgia</u> , thyroid function test abnormal                                                   | Visited a Health Care Provider           |
| 3/12/2013  | CONCOMITANT | Red yeast rice | 56 | Female | Blood cholesterol increased, fatigue, liver function test abnormal, malaise, <u>muscle spasms, myalgia</u> , thyroid function test abnormal                                                   | Visited a Health Care Provider           |
| 3/12/2013  | CONCOMITANT | Red yeast rice | 55 | Female | Blood cholesterol increased, fatigue, liver function test abnormal, malaise, <u>muscle spasms, myalgia</u> , thyroid function test abnormal                                                   | Visited a Health Care Provider           |
| 3/28/2008  | CONCOMITANT | Red yeast rice | 60 | Female | Blood selenium increased, blood urine present, body temperature increased, cough, diarrhoea, headache, hypotrichosis, jaundice, <u>muscle spasms</u> , nausea, pneumonia, skin discolouration | Visited a Health Care Provider           |

**Supplementary Table S6.** Details of hepatic adverse event reports in people taking red yeast rice (CAERS database)

| Date FDA first received report | Product type | Product                     | Patient age | Sex    | Reactions                                                                                                                                                                                                                                                                                                                                              | CASE_OUTCOME                                                                                                                             |
|--------------------------------|--------------|-----------------------------|-------------|--------|--------------------------------------------------------------------------------------------------------------------------------------------------------------------------------------------------------------------------------------------------------------------------------------------------------------------------------------------------------|------------------------------------------------------------------------------------------------------------------------------------------|
| 7/15/2021                      | SUSPECT      | Red yeast rice              | 46          | Male   | <u>Hepatic failure</u>                                                                                                                                                                                                                                                                                                                                 | Life Threatening, Hospitalization, Disability                                                                                            |
| 3/5/2019                       | SUSPECT      | Red yeast rice              | 60          | Female | <u>Hepatic enzyme increased</u> , renal disorder                                                                                                                                                                                                                                                                                                       | Other Serious or Important Medical Event, Visited a Health Care Provider                                                                 |
| 10/11/2018                     | SUSPECT      | Red yeast rice              | 66          | Female | Abdominal discomfort, abdominal pain upper, <u>alanine aminotransferase increased, aspartate aminotransferase increased</u> , chest discomfort, chest pain, dyspepsia, epigastric discomfort, eructation, flatulence, gastrointestinal sounds abnormal, headache, malaise, muscle spasms, myalgia, pain in extremity                                   | Other Serious or Important Medical Event                                                                                                 |
| 2/18/2015                      | SUSPECT      | Red yeast rice with COQ10   | 64          | Female | Arthralgia, asthenia, cataract, dysstasia, fatigue, gait disturbance, <u>hepatic enzyme increased</u> , muscular weakness, miopathy, pain                                                                                                                                                                                                              | Disability                                                                                                                               |
| 7/11/2014                      | SUSPECT      | Red yeast rice              | 53          | Male   | <u>Liver function test abnormal</u>                                                                                                                                                                                                                                                                                                                    | Other Serious or Important Medical Event                                                                                                 |
| 7/25/2013                      | SUSPECT      | Red yeast rice              | 69          | Female | Chromaturia, faeces discoloured, hypercholesterolaemia, <u>jaundice, liver injury</u>                                                                                                                                                                                                                                                                  | Other Serious or Important Medical Event, Visited a Health Care Provider                                                                 |
| 6/22/2012                      | SUSPECT      | Red yeast rice 600 mg       | 36          | Male   | Abdominal pain upper, abdominal pain upper, <u>alanine aminotransferase increased, aspartate aminotransferase increased, hepatic enzyme increased, hepatic pain, liver function test abnormal</u>                                                                                                                                                      | Other Serious or Important Medical Event                                                                                                 |
| 9/21/2011                      | SUSPECT      | Red yeast rice              | 59          | Female | Abdominal pain upper, <u>liver function test abnormal</u>                                                                                                                                                                                                                                                                                              | Hospitalization                                                                                                                          |
| 12/6/2010                      | SUSPECT      | COQ -10 plus Red yeast rice | 64          | Male   | Anaemia, atrophy, back pain, blood creatinine increased, blood potassium increased, blood urea increased, fibrosis, glomerulosclerosis, haematocrit decreased, haemoglobin decreased, <u>hepatomegaly</u> , muscle spasms, nephritis interstitial, red blood cell count decreased, renal impairment, renal tubular atrophy, thrombotic microangiopathy | Required Intervention, Visited a Health Care Provider                                                                                    |
| 11/4/2008                      | SUSPECT      | Red yeast rice 600 mg       | 60          | Female | Influenza-like illness, <u>liver function test abnormal</u> , loss of consciousness, nausea, syncope                                                                                                                                                                                                                                                   | Hospitalization, Other Serious or Important Medical Event, Visited Emergency Room, Visited a Health Care Provider, Other Serious Outcome |
| 8/13/2018                      | CONCOMITANT  | Red yeast rice              | 67          | Female | <u>Liver function test abnormal</u>                                                                                                                                                                                                                                                                                                                    | Hospitalization, Other Serious or Important Medical Event, Visited Emergency Room, Visited a Health Care Provider                        |
| 11/28/2017                     | CONCOMITANT  | Red yeast rice              | 65          | Female | <u>Alanine aminotransferase increased</u> , respiratory disorder                                                                                                                                                                                                                                                                                       | Disability, Visited a Health Care Provider                                                                                               |
| 3/12/2013                      | CONCOMITANT  | Red yeast rice              | 67          | Female | Blood cholesterol increased, fatigue, <u>liver function test abnormal</u> , malaise, muscle spasms, myalgia, thyroid function test abnormal                                                                                                                                                                                                            | Visited a Health Care Provider                                                                                                           |
| 3/12/2013                      | CONCOMITANT  | Red yeast rice              | 69          | Female | Blood cholesterol increased, fatigue, <u>liver function test abnormal</u> , malaise, muscle spasms, myalgia, thyroid function test abnormal                                                                                                                                                                                                            | Visited a Health Care Provider                                                                                                           |
| 3/12/2013                      | CONCOMITANT  | Red yeast rice              | 45          | Female | Blood cholesterol increased, fatigue, <u>liver function test abnormal</u> , malaise, muscle spasms, myalgia, thyroid function test abnormal                                                                                                                                                                                                            | Visited a Health Care Provider                                                                                                           |
| 3/12/2013                      | CONCOMITANT  | Red yeast rice              | 57          | Male   | Blood cholesterol increased, fatigue, <u>liver function test abnormal</u> , malaise, muscle spasms, myalgia, thyroid function test abnormal                                                                                                                                                                                                            | Visited a Health Care Provider                                                                                                           |



|           |             |                            |    |        |                                                                                                                                             |                                                                                                          |
|-----------|-------------|----------------------------|----|--------|---------------------------------------------------------------------------------------------------------------------------------------------|----------------------------------------------------------------------------------------------------------|
| 3/12/2013 | CONCOMITANT | Red yeast rice             | 62 | Female | Blood cholesterol increased, fatigue, <u>liver function test abnormal</u> , malaise, muscle spasms, myalgia, thyroid function test abnormal | Visited a Health Care Provider                                                                           |
| 3/12/2013 | CONCOMITANT | Red yeast rice             | 77 | Female | Blood cholesterol increased, fatigue, <u>liver function test abnormal</u> , malaise, muscle spasms, myalgia, thyroid function test abnormal | Visited a Health Care Provider                                                                           |
| 3/12/2013 | CONCOMITANT | Red yeast rice             | 52 | Female | Blood cholesterol increased, fatigue, <u>liver function test abnormal</u> , malaise, muscle spasms, myalgia, thyroid function test abnormal | Visited a Health Care Provider                                                                           |
| 3/12/2013 | CONCOMITANT | Red yeast rice             |    |        | Blood cholesterol increased, fatigue, <u>liver function test abnormal</u> , malaise, muscle spasms, myalgia, thyroid function test abnormal | Visited a Health Care Provider                                                                           |
| 3/12/2013 | CONCOMITANT | Red yeast rice             | 39 | Female | Blood cholesterol increased, fatigue, <u>liver function test abnormal</u> , malaise, muscle spasms, myalgia, thyroid function test abnormal | Visited a Health Care Provider                                                                           |
| 3/12/2013 | CONCOMITANT | Red yeast rice             | 43 | Male   | Blood cholesterol increased, fatigue, <u>liver function test abnormal</u> , malaise, muscle spasms, myalgia, thyroid function test abnormal | Visited a Health Care Provider                                                                           |
| 3/12/2013 | CONCOMITANT | Red yeast rice             | 46 | Male   | Blood cholesterol increased, fatigue, <u>liver function test abnormal</u> , malaise, muscle spasms, myalgia, thyroid function test abnormal | Visited a Health Care Provider                                                                           |
| 3/12/2013 | CONCOMITANT | Red yeast rice             | 69 | Female | Blood cholesterol increased, fatigue, <u>liver function test abnormal</u> , malaise, muscle spasms, myalgia, thyroid function test abnormal | Visited a Health Care Provider                                                                           |
| 3/12/2013 | CONCOMITANT | Red yeast rice             | 59 | Male   | Blood cholesterol increased, fatigue, <u>liver function test abnormal</u> , malaise, muscle spasms, myalgia, thyroid function test abnormal | Visited a Health Care Provider                                                                           |
| 3/12/2013 | CONCOMITANT | Red yeast rice             | 58 | Male   | Blood cholesterol increased, fatigue, <u>liver function test abnormal</u> , malaise, muscle spasms, myalgia, thyroid function test abnormal | Visited a Health Care Provider                                                                           |
| 3/12/2013 | CONCOMITANT | Red yeast rice             | 56 | Female | Blood cholesterol increased, fatigue, <u>liver function test abnormal</u> , malaise, muscle spasms, myalgia, thyroid function test abnormal | Visited a Health Care Provider                                                                           |
| 3/12/2013 | CONCOMITANT | Red yeast rice             | 55 | Female | Blood cholesterol increased, fatigue, <u>liver function test abnormal</u> , malaise, muscle spasms, myalgia, thyroid function test abnormal | Visited a Health Care Provider                                                                           |
| 6/11/2009 | CONCOMITANT | Policosanol-Red yeast rice | 55 | Female | Abdominal pain, <u>hepatic enzyme increased</u> , hyperhydrosis, nausea, pancreatic disorder, pancreatitis                                  | Hospitalization, Other Serious or Important Medical Event, Visited Emergency Room, Other Serious Outcome |
